# Supplementary material for: The Rituximab Biosimilar CT-P10 in Rheumatology and Cancer: A Budget Impact Analysis in 28 European Countries
Source: Springer Nature journal article supplement (doi:10.1007/s12325-017-0522-y), 2017-04-10
Supplement: MOESM1 [file 12212742]

## SUPPLEMENTARY MATERIALS

**Supplementary Table S1** Budget impact analysis model assumptions and parameters

| Assumptions, parameters                                                                              | Value            | Source                   |
|------------------------------------------------------------------------------------------------------|------------------|--------------------------|
| Price of CT-P10 (% of MabThera® price)                                                               | 70               | Assumption               |
| CT-P10 uptake (% market share)                                                                       | 30               | Assumption               |
| Consumption in other indications* and off-label use<br>(% of total mg consumption from IMS)          | 10               | Assumption               |
| Share of the remaining IMS-derived mg consumption<br>attributed to use in rheumatoid arthritis (%)   | 20               | Roche finance report [1] |
| Share of the remaining IMS-derived mg consumption<br>attributed to use in three cancer diagnoses (%) | 80               | Roche finance report [1] |
| Incidence rates of cancers, per 100,000 population (95% CI)                                          |                  |                          |
| DLBCL                                                                                                | 3.81 (3.73–3.89) | Sant et al 2010 [2]      |
| FL                                                                                                   | 2.18 (2.12–2.24) | Sant et al 2010 [2]      |
| CLL                                                                                                  | 4.92 (4.83–5.01) | Sant et al 2010 [2]      |

## RTX treatment rates in cancer (%)

|       |    |                                              |
|-------|----|----------------------------------------------|
| DLBCL | 95 | Gang et al. 2015 [3]<br>Issa et al. 2015 [4] |
| FL    | 80 | Junlén et al. 2015 [5]                       |
| CLL   | 78 | Knauff et al. 2015 [6]                       |

## Other assumptions for FL

|                                                         |      |                                   |
|---------------------------------------------------------|------|-----------------------------------|
| Patients who receive maintenance therapy (%)            | 80   | Marcus et al. 2008 [7]            |
| Retreatment rate (%)                                    | 20   | Based on authors' expert opinions |
| Average body surface area of patients (m <sup>2</sup> ) | 1.79 | Sacco 2010 [8]                    |

---

\*Use in granulomatosis with polyangiitis (formerly Wegener's granulomatosis) and microscopic polyangiitis.

*CI* confidence interval, *CLL* chronic lymphocytic leukemia, *DLBCL* diffuse large B cell lymphoma, *FL* follicular lymphoma, *RTX* reference rituximab.

**Supplementary Table S2** Sources of reference rituximab list prices. Data accessed on: 14 February 2017

| Country  | Currency | List price<br>(2×100 mg) | List price<br>(500 mg) | Source                                                                              | Available from                                                                                                                                                                                                                                                                                                      |
|----------|----------|--------------------------|------------------------|-------------------------------------------------------------------------------------|---------------------------------------------------------------------------------------------------------------------------------------------------------------------------------------------------------------------------------------------------------------------------------------------------------------------|
| Austria  | EUR      | 899.00                   | 2158.35                | Lotos Apotheke                                                                      | <a href="http://www.lotosapotheke.at/">http://www.lotosapotheke.at/</a>                                                                                                                                                                                                                                             |
| Belgium  | EUR      | 410.76                   | 1035.79                | Rijksinstituut voor ziekte- en invaliditeitsverzekering. Pharmaceutical list prices | <a href="http://www.inami.fgov.be/SiteCollectionDocuments/liste-specialites-prices-20170101.pdf">http://www.inami.fgov.be/SiteCollectionDocuments/liste-specialites-prices-20170101.pdf</a>                                                                                                                         |
| Bulgaria | BGN      | 1013.45                  | 2484.47                | e-Аптека - Framar.bg                                                                | <a href="http://apteka.framar.bg/30037107/%D0%BC%D0%B0%D0%B1%D1%82%D0%B5%D1%80%D0%B0%D1%84%D0%BB%D0%B0%D0%BA%D0%BE%D0%BD-100-%D0%BC%D0%B3-10-%D0%BC%D0%BB-2">http://apteka.framar.bg/30037107/%D0%BC%D0%B0%D0%B1%D1%82%D0%B5%D1%80%D0%B0%D1%84%D0%BB%D0%B0%D0%BA%D0%BE%D0%BD-100-%D0%BC%D0%B3-10-%D0%BC%D0%BB-2</a> |
| Croatia  | HRK      | 3755.49                  | 9220.34                | Mediatelly. Cjelokupna baza podataka o lijekovima dostupnih u Hrvatskoj             | <a href="https://mediatelly.co/hr/drugs/">https://mediatelly.co/hr/drugs/</a>                                                                                                                                                                                                                                       |
| Cyprus   | EUR      | 662.35                   | 1624.52                | Republic of Cyprus. Ministry of Health                                              | <a href="http://www.moh.gov.cy/moh/phs/p hs.nsf/dmlpress_en/dmlpress_en?OpenDocument&amp;highlight=mabthera">http://www.moh.gov.cy/moh/phs/p hs.nsf/dmlpress_en/dmlpress_en?OpenDocument&amp;highlight=mabthera</a>                                                                                                 |

|                |     |          |          |                                                                                                                                         |                                                                                                                                                                                         |
|----------------|-----|----------|----------|-----------------------------------------------------------------------------------------------------------------------------------------|-----------------------------------------------------------------------------------------------------------------------------------------------------------------------------------------|
| Czech Republic | CZK | 11427.77 | 28707.57 | State Institute for Drug Control (SÚKL)                                                                                                 | <a href="http://www.sukl.eu/modules/medication/search.php">http://www.sukl.eu/modules/medication/search.php</a>                                                                         |
| Denmark        | DKK | 5188.15  | 12943.30 | Lægemiddelstyrelsens hjemmeside med Danske medicinpriser                                                                                | <a href="http://www.medicinpriser.dk/">http://www.medicinpriser.dk/</a>                                                                                                                 |
| Estonia        | EUR | 642.42   | 1606.03  | Tervishoiuteenuste loetelu peatükis "Meditisiiniseadmed ja ravimid" sisalduvate ravimite maksumus, kasutusvajadus ja osakaalud teenuses | <a href="https://www.haigekassa.ee/sites/default/files/board_decision_files/lsa15.xlsx">https://www.haigekassa.ee/sites/default/files/board_decision_files/lsa15.xlsx</a>               |
| Finland        | EUR | 708.26   | 1966.31  | Kela. Medicinal Products Database                                                                                                       | <a href="http://www.kela.fi/web/en/medicinal-products-database">http://www.kela.fi/web/en/medicinal-products-database</a>                                                               |
| France         | EUR | 474.61   | 1186.52  | <a href="http://www.roche.fr">http://www.roche.fr</a>                                                                                   | <a href="http://www.roche.fr/pharma/traitements-medicaux-innovants/nos-produits/mabthera.html">http://www.roche.fr/pharma/traitements-medicaux-innovants/nos-produits/mabthera.html</a> |
| Germany        | EUR | 840.19   | 2044.49  | Medipreis. Preisvergleich für Medikamente                                                                                               | <a href="https://www.medipreis.de">https://www.medipreis.de</a>                                                                                                                         |
| Greece         | EUR | 418.49   | 1050.02  | Ιατροφαρμακευτική πληροφόρηση για τον επαγγελματία υγείας                                                                               | <a href="http://www.galinos.gr/">http://www.galinos.gr/</a>                                                                                                                             |

|            |     |           |           |                                                                                                                       |                                                                                                                                                                                                                                |
|------------|-----|-----------|-----------|-----------------------------------------------------------------------------------------------------------------------|--------------------------------------------------------------------------------------------------------------------------------------------------------------------------------------------------------------------------------|
| Hungary    | HUF | 145081.00 | 361207.00 | National Health Insurance Fund Administration of Hungary. Official pharmaceutical list prices (January 2017)          | <a href="http://www.neak.gov.hu//data/cms1013832/PUPHA_20170101_v2_kozos.zip">http://www.neak.gov.hu//data/cms1013832/PUPHA_20170101_v2_kozos.zip</a>                                                                          |
| Ireland    | EUR | 507.25    | 1266.09   | Ireland's Health Service Executive                                                                                    | <a href="http://www.hse.ie/eng/about/Who/cpu/iphaPricechanges.pdf">http://www.hse.ie/eng/about/Who/cpu/iphaPricechanges.pdf</a>                                                                                                |
| Italy      | EUR | 870.48    | 2175.78   | Medicina e Società                                                                                                    | <a href="http://www.medisoc.it/scheda-rituximab/">http://www.medisoc.it/scheda-rituximab/</a>                                                                                                                                  |
| Latvia     | EUR | 441.50    | 1102.00   | A Slimnīca                                                                                                            | <a href="https://www.aslimnica.lv/sites/default/files/iesniegumu_pielikumi/specifikacija_23k_1.xls">https://www.aslimnica.lv/sites/default/files/iesniegumu_pielikumi/specifikacija_23k_1.xls</a>                              |
| Lithuania  | EUR | 731.81    | 1719.71   | Vaistai.lv - Drug information system                                                                                  | <a href="http://www.vaistai.lt/paieska/mabthera.html?AND">http://www.vaistai.lt/paieska/mabthera.html?AND</a><br><a href="http://www.visivaistai.lt/Vaistai/Mabthera/5975">http://www.visivaistai.lt/Vaistai/Mabthera/5975</a> |
| Luxembourg | EUR | 420.90    | 1061.37   | Memorial. Journal Officiel du Grand-Duché de Luxembourg. Liste des Prix des Médicaments. 1 February 2016. pp. 175–442 | <a href="http://www.apl-pharma.lu/docs/legis/liste-prix-medicaments-au-01-01-2016.pdf">http://www.apl-pharma.lu/docs/legis/liste-prix-medicaments-au-01-01-2016.pdf</a>                                                        |

|             |     |         |         |                                                                                  |                                                                                                                                                                                                                             |
|-------------|-----|---------|---------|----------------------------------------------------------------------------------|-----------------------------------------------------------------------------------------------------------------------------------------------------------------------------------------------------------------------------|
| Malta       | EUR | 750.00  | 1380.00 | Ministry for Health, the Elderly, and Community Care (Malta)                     | <a href="https://health.gov.mt/en/cpsu/Documents/DCC%20Recommendations/Archive/DCC%20Recommendations%202011.pdf">https://health.gov.mt/en/cpsu/Documents/DCC%20Recommendations/Archive/DCC%20Recommendations%202011.pdf</a> |
| Netherlands | EUR | 554.91  | 1387.29 | Medicijnkosten                                                                   | <a href="http://www.medicijnkosten.nl">http://www.medicijnkosten.nl</a>                                                                                                                                                     |
| Poland      | PLN | 2445.01 | 6112.52 | Wykaz leków refundowanych obowiązujący od dnia 1 stycznia 2017. Onkologia Online | <a href="http://www.onkologia-online.pl/medicine/show/219,mabthera%C2%AE">http://www.onkologia-online.pl/medicine/show/219,mabthera%C2%AE</a>                                                                               |
| Portugal    | EUR | 457.62  | 1138.93 | van Harten et al [9]; Carvalho et al [10]                                        | n/a                                                                                                                                                                                                                         |
| Romania     | RON | 2221.55 | 5509.03 | Lista medicamentelor compensate A-Z                                              | <a href="http://medicamentecompensate.duv.ro/Lista-medicamentelor-compensate-A-Z.htm">http://medicamentecompensate.duv.ro/Lista-medicamentelor-compensate-A-Z.htm</a>                                                       |
| Slovakia    | EUR | 494.36  | 1226.16 | Vitajte                                                                          | <a href="https://www.adc.sk/databazy/produkty">https://www.adc.sk/databazy/produkty</a>                                                                                                                                     |
| Slovenia    | EUR | 577.03  | 1442.64 | Mediatelly. Popolna zbirka podatkov o zdravilih na voljo v Sloveniji             | <a href="https://mediately.co/si/drugs">https://mediately.co/si/drugs</a>                                                                                                                                                   |
| Spain       | EUR | 567.93  | 1342.06 | Nomenclator.org Información sobre medicamentos, December 30, 2016                | <a href="http://nomenclator.org/2016/mabthera-100-mg-concentrado-solucion/">http://nomenclator.org/2016/mabthera-100-mg-concentrado-solucion/</a>                                                                           |

|                   |     |         |         |                                                               |                                                                                                                   |
|-------------------|-----|---------|---------|---------------------------------------------------------------|-------------------------------------------------------------------------------------------------------------------|
| Sweden            | SVK | 3787.00 | 9468.00 | Swedish Dental and<br>Pharmaceutical Benefits Agency<br>(TLV) | <a href="http://www.tlv.se/In-English/medicines-new/">http://www.tlv.se/In-English/medicines-new/</a>             |
| United<br>Kingdom | GBP | 349.26  | 873.15  | British National Formulary 72                                 | <a href="https://www.evidence.nhs.uk/formulary/bnf/current">https://www.evidence.nhs.uk/formulary/bnf/current</a> |

---

**Supplementary Table S3** Projected budget impact (savings) over 1 year due to the introduction of CT-P10, and the number of additional patients\* that could subsequently gain access to rituximab treatment (scenario 2\*\*)

|                | RA                         |                 | NHL†                       |                 | CLL                        |                 | Other indications‡<br>and off-label use |                 | Total§                     |                 |
|----------------|----------------------------|-----------------|----------------------------|-----------------|----------------------------|-----------------|-----------------------------------------|-----------------|----------------------------|-----------------|
|                | Budget impact, million EUR | No. of patients | Budget impact, million EUR | No. of patients | Budget impact, million EUR | No. of patients | Budget impact, million EUR              | No. of patients | Budget impact, million EUR | No. of patients |
| Austria        | -1.48                      | 122             | -2.42                      | 97              | -1.10                      | 70              | -0.56                                   | 34              | -5.56                      | 322             |
| Belgium        | -0.61                      | 104             | -0.97                      | 83              | -0.44                      | 59              | -0.22                                   | 29              | -2.24                      | 275             |
| Bulgaria       | -0.23                      | 32              | -0.37                      | 25              | -0.17                      | 18              | -0.08                                   | 9               | -0.84                      | 84              |
| Croatia        | -0.22                      | 33              | -0.36                      | 26              | -0.17                      | 19              | -0.08                                   | 9               | -0.83                      | 86              |
| Czech Republic | -0.18                      | 30              | -0.28                      | 24              | -0.13                      | 17              | -0.07                                   | 8               | -0.66                      | 79              |
| Finland        | -1.17                      | 106             | -1.78                      | 84              | -0.81                      | 60              | -0.42                                   | 30              | -4.18                      | 280             |
| France         | -5.49                      | 826             | -8.79                      | 654             | -4.01                      | 469             | -2.03                                   | 228             | -20.32                     | 2177            |
| Germany        | -9.14                      | 799             | -14.85                     | 632             | -6.77                      | 454             | -3.42                                   | 219             | -34.18                     | 2104            |
| Hungary        | -0.38                      | 58              | -0.61                      | 46              | -0.28                      | 33              | -0.14                                   | 16              | -1.42                      | 154             |
| Ireland        | -0.43                      | 61              | -0.69                      | 48              | -0.32                      | 35              | -0.16                                   | 17              | -1.60                      | 160             |
| Italy          | -7.18                      | 589             | -11.51                     | 467             | -5.25                      | 335             | -2.66                                   | 163             | -26.60                     | 1553            |
| Netherlands    | -1.36                      | 174             | -2.17                      | 138             | -0.99                      | 99              | -0.50                                   | 48              | -5.02                      | 460             |
| Poland         | -1.82                      | 233             | -2.91                      | 184             | -1.33                      | 132             | -0.67                                   | 64              | -6.74                      | 613             |



|                |       |     |       |     |       |     |       |     |        |      |
|----------------|-------|-----|-------|-----|-------|-----|-------|-----|--------|------|
| Portugal       | -0.28 | 44  | -0.45 | 34  | -0.20 | 25  | -0.10 | 12  | -1.03  | 115  |
| Romania        | -0.51 | 75  | -0.83 | 60  | -0.38 | 43  | -0.19 | 21  | -1.91  | 198  |
| Slovakia       | -0.30 | 44  | -0.49 | 35  | -0.22 | 25  | -0.11 | 12  | -1.13  | 117  |
| Slovenia       | -0.19 | 23  | -0.30 | 18  | -0.14 | 13  | -0.07 | 6   | -0.69  | 61   |
| Spain          | -3.32 | 441 | -5.47 | 350 | -2.50 | 251 | -1.25 | 121 | -12.54 | 1162 |
| Sweden         | -0.98 | 175 | -1.56 | 139 | -0.71 | 100 | -0.36 | 48  | -3.62  | 462  |
| United Kingdom | -3.06 | 531 | -4.90 | 420 | -2.23 | 302 | -1.13 | 147 | -11.32 | 1400 |

**Estimates for European Union countries where IMS data are not available**

|                    |        |      |        |      |        |      |        |      |         |       |
|--------------------|--------|------|--------|------|--------|------|--------|------|---------|-------|
| Cyprus             | -0.07  | 8    | -0.12  | 6    | -0.05  | 5    | -0.03  | 2    | -0.27   | 21    |
| Denmark            | -0.99  | 102  | -1.59  | 81   | -0.73  | 58   | -0.37  | 28   | -3.68   | 268   |
| Estonia            | -0.07  | 8    | -0.12  | 6    | -0.05  | 5    | -0.03  | 2    | -0.27   | 21    |
| Greece             | -0.61  | 103  | -0.97  | 82   | -0.44  | 59   | -0.22  | 28   | -2.24   | 272   |
| Latvia             | -0.08  | 12   | -0.12  | 10   | -0.05  | 7    | -0.03  | 3    | -0.28   | 32    |
| Lithuania          | -0.17  | 18   | -0.28  | 14   | -0.13  | 10   | -0.07  | 5    | -0.65   | 47    |
| Luxembourg         | -0.03  | 6    | -0.06  | 5    | -0.03  | 3    | -0.01  | 2    | -0.13   | 15    |
| Malta              | -0.03  | 4    | -0.06  | 3    | -0.03  | 2    | -0.01  | 1    | -0.13   | 11    |
| Total <sup>§</sup> | -40.37 | 4762 | -65.03 | 3771 | -29.67 | 2706 | -15.01 | 1312 | -150.07 | 12551 |

\*Number of additional patients that could access rituximab treatment if all projected budget savings from the introduction of CT-P10 were allocated to this.

\*\*Scenario 2 assumed CT-P10 uptake of 50% and that the cost of CT-P10 was 70% of the cost of reference rituximab.

†NHL comprised diffuse large B cell lymphoma and stage III–IV follicular lymphoma.

‡Granulomatosis with polyangiitis (formerly Wegener's granulomatosis) and microscopic polyangiitis.

§Total values may differ slightly from the sum of individual values, due to rounding.

*CLL* chronic lymphocytic leukemia, *NHL* non-Hodgkin's lymphoma, *RA* rheumatoid arthritis.

**Supplementary Table S4** Projected budget impact (savings) over 3 years\* due to the introduction of CT-P10, and the number of additional patients\*\* that could subsequently gain access to rituximab treatment

|                | RA                         |                 | NHL†                       |                 | CLL                        |                 | Other indications‡<br>and off-label use |              | Total§                     |                 |
|----------------|----------------------------|-----------------|----------------------------|-----------------|----------------------------|-----------------|-----------------------------------------|--------------|----------------------------|-----------------|
|                | Budget impact, million EUR | No. of patients | Budget impact, million EUR | No. of patients | Budget impact, million EUR | No. of patients | Budget impact, million EUR              | No. patients | Budget impact, million EUR | No. of patients |
| Austria        | -5.62                      | 465             | -9.19                      | 368             | -4.19                      | 264             | -2.11                                   | 127          | -21.12                     | 1225            |
| Belgium        | -2.30                      | 397             | -3.67                      | 314             | -1.68                      | 226             | -0.85                                   | 110          | -8.50                      | 1046            |
| Bulgaria       | -0.86                      | 121             | -1.39                      | 96              | -0.63                      | 69              | -0.32                                   | 33           | -3.21                      | 318             |
| Croatia        | -0.85                      | 125             | -1.37                      | 99              | -0.63                      | 71              | -0.32                                   | 34           | -3.17                      | 329             |
| Czech Republic | -0.68                      | 114             | -1.08                      | 90              | -0.49                      | 65              | -0.25                                   | 31           | -2.50                      | 300             |
| Finland        | -4.44                      | 404             | -6.77                      | 320             | -3.09                      | 229             | -1.59                                   | 113          | -15.88                     | 1065            |
| France         | -20.85                     | 3138            | -33.41                     | 2485            | -15.24                     | 1783            | -7.72                                   | 866          | -77.23                     | 8272            |
| Germany        | -34.74                     | 3034            | -56.43                     | 2403            | -25.74                     | 1724            | -12.99                                  | 834          | -129.90                    | 7995            |
| Hungary        | -1.46                      | 222             | -2.34                      | 176             | -1.07                      | 126             | -0.54                                   | 61           | -5.40                      | 585             |

---

|                |        |      |        |      |        |      |        |     |         |      |
|----------------|--------|------|--------|------|--------|------|--------|-----|---------|------|
| Ireland        | -1.64  | 231  | -2.63  | 183  | -1.20  | 131  | -0.61  | 64  | -6.08   | 610  |
| Italy          | -27.29 | 2239 | -43.72 | 1773 | -19.95 | 1272 | -10.11 | 618 | -101.06 | 5903 |
| Netherlands    | -5.15  | 663  | -8.25  | 525  | -3.77  | 377  | -1.91  | 183 | -19.08  | 1748 |
| Poland         | -6.91  | 884  | -11.07 | 700  | -5.05  | 502  | -2.56  | 244 | -25.60  | 2330 |
| Portugal       | -1.06  | 165  | -1.69  | 131  | -0.77  | 94   | -0.39  | 46  | -3.91   | 436  |
| Romania        | -1.95  | 286  | -3.14  | 226  | -1.43  | 162  | -0.73  | 79  | -7.26   | 753  |
| Slovakia       | -1.15  | 168  | -1.86  | 133  | -0.85  | 96   | -0.43  | 46  | -4.29   | 443  |
| Slovenia       | -0.71  | 87   | -1.13  | 69   | -0.52  | 50   | -0.26  | 24  | -2.61   | 230  |
| Spain          | -12.61 | 1677 | -20.78 | 1328 | -9.48  | 953  | -4.76  | 459 | -47.63  | 4417 |
| Sweden         | -3.71  | 667  | -5.95  | 528  | -2.71  | 379  | -1.37  | 184 | -13.74  | 1757 |
| United Kingdom | -11.62 | 2018 | -18.61 | 1598 | -8.49  | 1147 | -4.30  | 557 | -43.02  | 5319 |

**Estimates for European Union countries where IMS data are not available**

|         |       |     |       |     |       |     |       |     |        |      |
|---------|-------|-----|-------|-----|-------|-----|-------|-----|--------|------|
| Cyprus  | -0.28 | 31  | -0.45 | 24  | -0.21 | 17  | -0.10 | 8   | -1.04  | 81   |
| Denmark | -3.77 | 387 | -6.05 | 306 | -2.76 | 220 | -1.40 | 107 | -13.99 | 1020 |
| Estonia | -0.27 | 31  | -0.44 | 24  | -0.20 | 17  | -0.10 | 8   | -1.02  | 81   |

|                    |         |       |         |       |         |       |        |      |         |       |
|--------------------|---------|-------|---------|-------|---------|-------|--------|------|---------|-------|
| Greece             | -2.31   | 392   | -3.69   | 310   | -1.68   | 223   | -0.85  | 108  | -8.53   | 1034  |
| Latvia             | -0.29   | 46    | -0.46   | 37    | -0.21   | 26    | -0.11  | 13   | -1.06   | 122   |
| Lithuania          | -0.65   | 68    | -1.08   | 54    | -0.49   | 39    | -0.25  | 19   | -2.48   | 179   |
| Luxembourg         | -0.13   | 22    | -0.21   | 17    | -0.10   | 13    | -0.05  | 6    | -0.48   | 58    |
| Malta              | -0.12   | 16    | -0.23   | 12    | -0.10   | 9     | -0.05  | 4    | -0.50   | 41    |
| Total <sup>§</sup> | -153.41 | 18097 | -247.10 | 14330 | -112.74 | 10283 | -57.03 | 4986 | -570.28 | 47695 |

\*Scenario assumed CT-P10 uptake of 30% in the first year, 40% in the second year and 50% in the third year, and that the cost of CT-P10 was 70% of the cost of reference rituximab.

\*\*Number of additional patients that could access rituximab treatment if all projected budget savings from the introduction of CT-P10 were allocated to this.

†NHL comprised diffuse large B cell lymphoma and stage III–IV follicular lymphoma.

‡Granulomatosis with polyangiitis (formerly Wegener's granulomatosis) and microscopic polyangiitis.

§Total values may differ slightly from the sum of individual values, due to rounding.

*CLL* chronic lymphocytic leukemia, *NHL* non-Hodgkin's lymphoma, *RA* rheumatoid arthritis.

## REFERENCES

1. Roche. Finance report 2015. 2015; Available at: <http://www.roche.com/dam/jcr:74af99eb-b51a-4f13-88b2-aacaf9f53c0c/en/fb15e.pdf>. Accessed 23 February 2017.
2. Sant M, Allemani C, Tereanu C, et al. Incidence of hematologic malignancies in Europe by morphologic subtype: results of the HAEMACARE project. *Blood*. 2010;116:3724–34.
3. Gang AO, Pedersen M, d'Amore F, et al. A clinically based prognostic index for diffuse large B-cell lymphoma with a cut-off at 70 years of age significantly improves prognostic stratification: population-based analysis from the Danish Lymphoma Registry. *Leuk Lymphoma*. 2015;56:2556–62.
4. Issa DE, van de Schans SA, Chamuleau ME, et al. Trends in incidence, treatment and survival of aggressive B-cell lymphoma in the Netherlands 1989-2010. *Haematologica*. 2015;100:525–33.
5. Junlen HR, Peterson S, Kimby E, et al. Follicular lymphoma in Sweden: nationwide improved survival in the rituximab era, particularly in elderly women: a Swedish Lymphoma Registry study. *Leukemia*. 2015;29:668–76.
6. Knauf W, Abenhardt W, Dorfel S, et al. Routine treatment of patients with chronic lymphocytic leukaemia by office-based haematologists in Germany – data from the Prospective Tumour Registry Lymphatic Neoplasms. *Hematol Oncol*. 2015;33:15–22.
7. Marcus R, Imrie K, Solal-Celigny P, et al. Phase III study of R-CVP compared with cyclophosphamide, vincristine, and prednisone alone in patients with previously untreated advanced follicular lymphoma. *J Clin Oncol*. 2008;26:4579–86.
8. Sacco JJ, Botten J, Macbeth F, Bagust A, Clark P. The average body surface area of adult cancer patients in the UK: a multicentre retrospective study. *PLoS One*. 2010;5:e8933.
9. van Harten WH, Wind A, de Paoli P, Saghatchian M, Oberst S. Actual costs of cancer drugs in 15 European countries. *Lancet Oncol*. 2016;17:18–20.
10. Carvalho S, Gomes M, Pereira C, Rubio-Rodríguez D, Sottomayor C. Cost-effectiveness analysis of rituximab maintenance treatment in patients with follicular lymphoma who respond to first line induction therapy in Portugal. *Rev Port Farmacoter*. 2016;8:17–26.
